# Supplementary material
Source: Research Square preprint supplement (doi:10.21203/rs.3.rs-9740401/v1)
Supplement: Supplementary file 1 [file 7c9e1857c5be9f7f7ed74848.docx]

**Supplementary Materials**

**Supplementary Material S1: Robust Federated Multi-Model Collaboration Framework**

**Robust Knowledge Transfer Module (RKTM )**

Compared with traditional convolutional neural networks, VFMs possess stronger general-purpose visual feature extraction capability and can provide rich transferable representations. However, transferring knowledge from VFMs to medical imaging tasks is challenging due to (i) the domain discrepancy between natural and medical images and (ii) potential redundancy or mismatch across layers. In addition, multi-center heterogeneity implies that the optimal transferable knowledge may vary by center.

To address these issues, RKTM enables each local model to adaptively learn generalizable knowledge from the VFM. RKTM automatically computes layer-wise transfer weights to establish effective transfer pathways between the VFM and the lightweight local model. The transfer weights are dynamically updated based on changes in local model performance, allowing the system to continuously refine which VFM layers provide robust and task-relevant guidance. Furthermore, RKTM evaluates the layer-wise compatibility between the VFM and each local model, identifying robust key layers that successfully absorb transferable general knowledge. These robust layers are subsequently frozen during federated training to reduce catastrophic forgetting and preserve locally important knowledge.

In this study, two feature matching transfer networks are constructed to enable the transfer of personalized features from the vision foundation model to the local CNN model. According to Equation (1), the feature representation discrepancy between the vision foundation model and the CNN on local data is measured. By minimizing this discrepancy, the learning process of the CNN from the vision foundation model is constrained.

Here, *(m,n)∈a*, where *a* is a predefined set of matching pairs. denotes the intermediate feature map from the m-th layer of the vision foundation model, and denotes the intermediate feature map from the n-th layer of the CNN. is a linear transformation parameterized by , which ensures consistency in the number of feature mappings between the two models.

Each convolutional layer of the CNN is composed of multiple convolutional kernels. The CNN extracts data features through these kernels, with each kernel producing an intermediate feature map. After applying a linear transformation, these intermediate feature maps are matched one by one with the intermediate feature maps generated by the transformer blocks of the vision foundation model, thereby forming feature transfer channels. A feature matching transfer network *f* is employed to compute the weight of each feature transfer channel. The structure of the feature matching transfer network *f* consists of P groups of fully connected layers, pooling layers, and a softmax layer. This network takes features from the vision foundation model as input and generates outputs through the softmax layer. In Equation (2), is a learnable parameter designed to facilitate the matching between the features of the m-th layer of the vision foundation model and the n-th layer of the CNN model*.*

Then, a feature matching transfer network *g* is employed to compute the weight for layer matching between models. The structure of the feature matching transfer network *g* consists of P groups of fully connected layers, pooling layers, and a ReLU6 layer, forming a fully connected network. This network takes the features from the vision foundation model as input and generates the output through the ReLU6 activation layer.

Here, >0. The feature matching transfer network is updated based on the variation of the CNN loss, and the parameters of are composed of two parts: *f* and *g*.
Finally, the CNN parameters exhibit redundancy, and existing studies have demonstrated the feasibility of simultaneously ensuring robustness and generalization. The feature matching transfer network calculates the adaptability of model layers between the vision foundation model and the local model, reflecting both the amount of general knowledge that the local model layers learn from the vision foundation model and the criticality of the model layers in terms of robustness. The key layers responsible for robustness are frozen to prevent the local model from forgetting personalized knowledge during the second stage of decentralized federated learning.
By combining Equation (1), Equation (2), and Equation (3), the total loss for knowledge transfer can be obtained:

Here, H×W denotes the size of the output feature maps from and .
Therefore, the total training loss in the first stage is given in Equation (5), where represents the cross-entropy loss of *Ti*, and >0 is a hyperparameter.

The optimization objective of the first stage of the local model *Ti* is:

**Knowledge-guided Sample Distillation Learning (KSDL) Module**

In multi-center medical imaging, variations in imaging devices, scanning protocols, and image quality often lead to substantial heterogeneity, which may cause local models to overfit center-specific patterns and degrade external performance. Although federated aggregation allows centers to collaboratively learn a global model without sharing raw data, the global shared model can still be biased under non-IID distributions.

To alleviate this issue, we designed a KSDL module to identify low-heterogeneity samples from each center’s private data as guidance for distillation. During collaborative training, both the global model and the local model compute feature representations and prediction distributions on randomly sampled local data. Because local models tend to quickly fit center-specific heterogeneous patterns, their prediction distributions may diverge from those of the global model. KSDL quantifies the divergence rate between the global and local predictions and selects representative samples with relatively low divergence, which are considered to capture cross-center consensus knowledge. These selected samples are used for distillation, enabling local models to absorb generalized features learned from other centers, thereby reducing overfitting to center-specific biases and improving cross-center generalization. After local training, each center uploads its updated model to the server, where aggregation produces a new global shared model.

We compute the Kulback-Leibler(KL) divergence based on equation (7). Simultaneously, by utilizing the predicted probability distribution of the local model and the true label distribution, we calculate the distribution discrepancy based on equation (8).

(7)

(8)

In the above equations, *Q1* represents the predicted probability distribution output by the shared model based on the local model representation, *Q2* represents the predicted probability distribution output by the shared model based on its own representation, and *P* represents the true label distribution. i denotes the index of the category. *Q3* represents the probability distribution of predictions based on the outputs of the local model's representations.

The second stage knowledge distillation loss function was constructed based on the KL divergence. After freezing the robustness key layers obtained in the first stage, the remaining model layers of the local model are constrained to obtain multi-center knowledge from the shared model. The total loss function for Stage II is given by Equation (9).

(9)

Where, *Z1* and *Z2* are probability distributions calculated by the shared model classification head based on the representations generated by the local model and the shared model for the same sample, respectively. is a hyper-parameter between 0 and 1, used to balance the relative importance of the two loss terms, with a default value of 0.5.

**Supplementary Material S2: The parameter Settings for the deep learning training process**

In this study, to ensure the validity of the comparison, all local models were initialized with ResNet-18 pre-trained on the ImageNet dataset.

**FedAvg model**: using SGD as the client optimizer with a learning rate of 0.0001, a weight decay of 0.0001, CrossEntropyLoss as the loss function, one training epoch per communication round, and a batch size of 32. On the server side, SGD with a momentum of 1 was employed as the optimizer. The model was trained for 20 communication rounds with a random seed of 4000.

**FedProx model**: using SGD as the client optimizer with a learning rate of 0.0001, a weight decay of 0.0001, CrossEntropyLoss as the loss function, one training epoch per communication round, and a batch size of 32. On the server side, SGD with a momentum of 0.9 was employed as the optimizer. The model was trained for 20 communication rounds with a random seed of 4000.

**MOON model**: using SGD as the client optimizer with a learning rate of 0.0001, a weight decay of 0.0001, CrossEntropyLoss as the loss function, one training epoch per communication round, and a batch size of 32. On the server side, SGD with a momentum of 0.9 was employed as the optimizer. The model was trained for 20 communication rounds with a random seed of 4000.

**HarmoFL model**: using SGD as the client optimizer with a learning rate of 0.0001, a weight decay of 0.0001, CrossEntropyLoss as the loss function, one training epoch per communication round, and a batch size of 32. On the server side, SGD with a momentum of 0.9 was employed as the optimizer. The model was trained for 20 communication rounds with a random seed of 4000.

**PFLS model**: The Visual Foundation Model (VFM) was implemented using DINOv2, while the local models were initialized with ResNet-18 pre-trained on the ImageNet dataset. using SGD as the client optimizer with a learning rate of 0.0001, a weight decay of 0.0001, CrossEntropyLoss as the loss function, one training epoch per communication round, and a batch size of 32. On the server side, SGD with a momentum of 0.9 was employed as the optimizer. The model was trained for 5 communication rounds with a random seed of 4000.


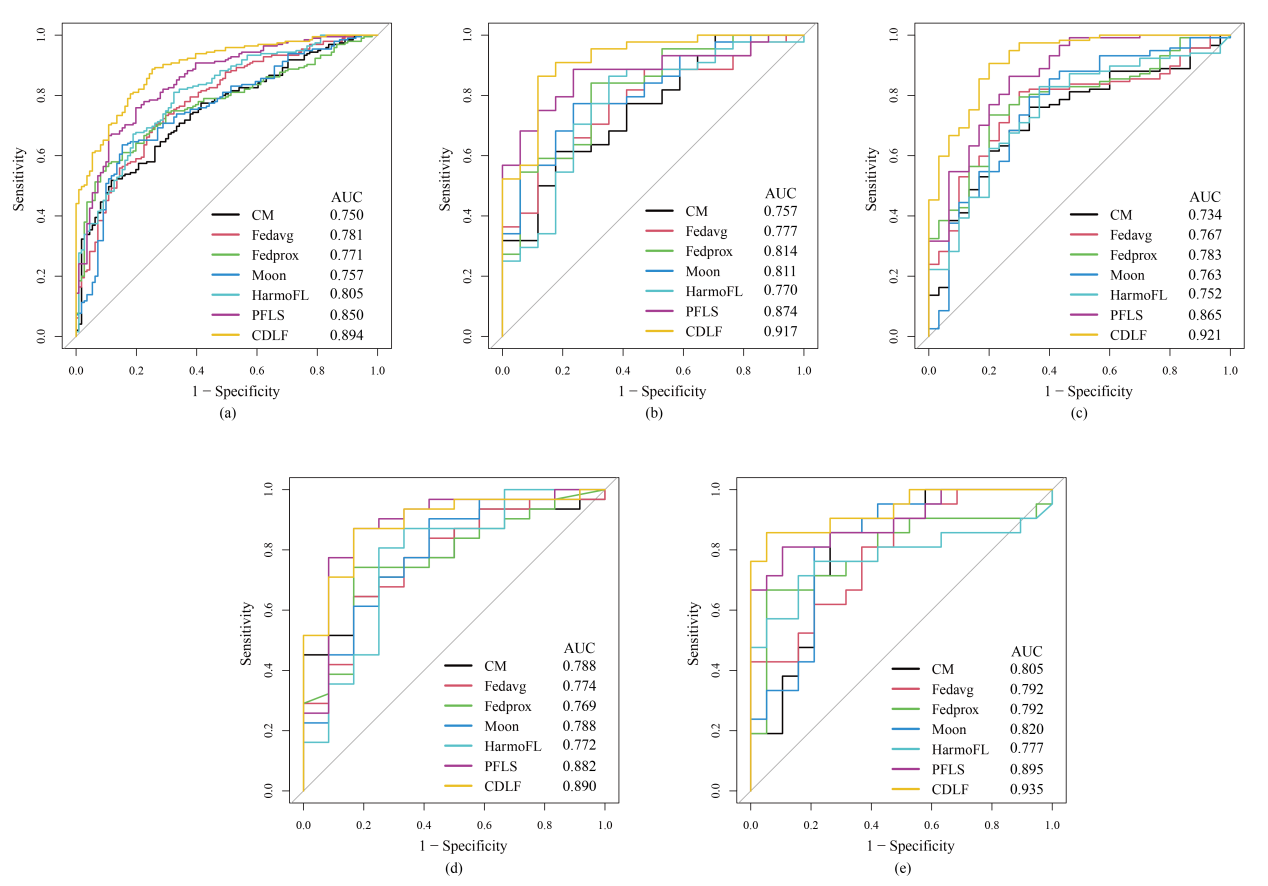


**Figure S1.** ROC curves of seven algorithms across the train sets of center A (a), center B (b), center C (c), center D (d) and center E (e).The AUC values indicate the overall discriminative ability of each method.

Notes: AUC, Area under the curve; CM, clinical model; Fedavg, federated averaging; Fedprox, federated proximal; Moon, model-contrastive federated learning; HarmoFL, harmonized federated learning; PFLS, personalized federated learning signatures; CDLF, clinical-deep learning fusion.

**Table S1**. CT Scanners and technique parameters used for chest CT examination in five Medical Centers

| **Center** | **CT Scanner** | **Company** | **Tube voltage**  **(kV)** | **Tube Current**  **(mA)** | **Pitch** | **Reconstruction kernel** | **Slice thickness (mm)** | **Image Matrix** |
| --- | --- | --- | --- | --- | --- | --- | --- | --- |
| **A** | Siemens Force Definition | Siemens Medical Solutions, Forchheim, Germany | 120 | Auto Care Dose | 1.20 | B30f | 0.75 | 512×512 |
| Toshiba Aquilion 64 Slice CT Scanner | Toshiba Medical Systems, Tokyo, Japan | 120 | Auto | 1.35 | FC03 | 1.25 | 512×512 |
| GE Discovery CT750 HD | GE Healthcare, Milwaukee, Wisconsin | 120 | Auto Smart mA | 1.375 | Standard | 0.625 | 512×512 |
| **B** | GE LightSpeed Ultra | GE Healthcare, Milwaukee, Wisconsin | 120 | Auto Smart mA | 1.50 | Standard | 1.25 | 512×512 |
| Philips Brilliance iCT | Koninklijke Philips N.V, Amsterdam, the Netherlands | 120 | Auto Dose Right | 1.20 | C | 0.625 | 512×512 |
| **C** | Siemens Force Definition | Siemens Medical Solutions, Forchheim, Germany | 120 | Auto Care Dose | 1.20 | B30f | 0.75 | 512×512 |
| Philips Brilliance iCT | Koninklijke Philips N.V, Amsterdam, the Netherlands | 120 | Auto Dose Right | 1.20 | C | 0.625 | 512×512 |
| **D** | Siemens Force Definition | Siemens Medical Solutions, Forchheim, Germany | 120 | Auto Care Dose | 1.20 | B30f | 0.75 | 512×512 |
| UIH uCT 760 | United Imaging Healthcare, Shanghai, China | 120 | Auto Smart mA | 1.20 | Soft | 0.625 | 512×512 |
| **E** | SOMATOM Seneation 64 | Siemens Medical Solutions, Forchheim, Germany | 120 | Auto Care Dose | 1.20 | B30f | 1.0 | 512×512 |
| Optima CT680 Expert | GE Healthcare, Milwaukee, Wisconsin | 120 | Auto Smart mA | 1.375 | Standard | 0.625 | 512×512 |

**Table S2**. The diagnostic performance of seven models on five central train sets

| **Center** |  | **AUC**  **(95% CI)** | **Sensitivity** | **Specificity** | **Accuracy** | **PPV** | **NPV** |
| --- | --- | --- | --- | --- | --- | --- | --- |
| **CenterA** | CM | 0.750  (0.6952-0.8044) | 0.518  (101/195) | 0.883  (98/111) | 0.650  (199/306) | 0.886  (101/114) | 0.510  (98/192) |
| Fedavg | 0.781  (0.7280-0.8341) | 0.703  (137/195) | 0.739  (82/111) | 0.716  (219/306) | 0.825  (137/166) | 0.586  (82/140) |
| Fedprox | 0.771  (0.7192-0.8235) | 0.574  (112/195) | 0.892  (99/111) | 0.690  (211/306) | 0.903  (112/124) | 0.544  (99/182) |
| Moon | 0.757  (0.7014-0.8133) | 0.636  (124/195) | 0.847  (94/111) | 0.712  (218/306) | 0.879  (124/141) | 0.570  (94/165) |
| HarmoFL | 0.805  (0.7554-0.8550) | 0.810  (158/195) | 0.676  (75/111) | 0.761  (233/306) | 0.814  (158/194) | 0.670  (75/112) |
| PFLS | 0.850  (0.8057-0.8939) | 0.759  (148/195) | 0.802  (89/111) | 0.775  (237/306) | 0.871  (148/170) | 0.654  (89/136) |
| CDLF | 0.894  (0.8589-0.9288) | 0.887  (173/195) | 0.748  (83/111) | 0.837  (256/306) | 0.861  (173/201) | 0.790  (83/105) |
| **CenterB** | CM | 0.757  (0.6247-0.8887) | 0.614  (27/44) | 0.824  (14/17) | 0.672  (41/61) | 0.900  (27/30) | 0.452  (14/31) |
| Fedavg | 0.777  (0.6544-0.8991) | 0.568  (25/44) | 0.882  (15/17) | 0.656  (40/61) | 0.926  (25/27) | 0.441  (15/34) |
| Fedprox | 0.814  (0.6954-0.9329) | 0.841  (37/44) | 0.706  (12/17) | 0.803  (49/61) | 0.881  (37/42) | 0.632  (12/19) |
| Moon | 0.811  (0.6982-0.9248) | 0.773  (34/44) | 0.765  (13/17) | 0.770  (47/61) | 0.895  (34/38) | 0.565  (13/23) |
| HarmoFL | 0.770  (0.6318-0.9083) | 0.864  (38/44) | 0.647  (11/17) | 0.803  (49/61) | 0.864  (38/44) | 0.647  (11/17) |
| PFLS | 0.874  (0.7863-0.9624) | 0.886  (39/44) | 0.765  (13/17) | 0.852  (52/61) | 0.907  (39/43) | 0.722  (13/18) |
| CDLF | 0.917  (0.8382-0.9960) | 0.864  (38/44) | 0.882  (15/17) | 0.869  (53/61) | 0.950  (38/40) | 0.714  (15/21) |
| **CenterC** | CM | 0.734  (0.6382-0.8296) | 0.761  (89/117) | 0.667  (20/30) | 0.741  (109/147) | 0.899  (89/99) | 0.417  (20/48) |
| Fedavg | 0.767  (0.6792-0.8547) | 0.812  (95/117) | 0.700  (21/30) | 0.789  (116/147) | 0.913  (95/104) | 0.488  (21/43) |
| Fedprox | 0.783  (0.6994-0.8669) | 0.735  (86/117) | 0.800  (24/30) | 0.748  (110/147) | 0.935  (86/92) | 0.436  (24/55) |
| Moon | 0.763  (0.6602-0.8663) | 0.795  (93/117) | 0.667  (20/30) | 0.769  (113/147) | 0.903  (93/103) | 0.455  (20/44) |
| HarmoFL | 0.752  (0.6550-0.8470) | 0.829  (97/117) | 0.633  (19/30) | 0.789  (116/147) | 0.898  (97/108) | 0.487  (19/39) |
| PFLS | 0.865  (0.7877-0.9422) | 0.863  (101/117) | 0.733  (22/30) | 0.837  (123/147) | 0.927  (101/109) | 0.579  (22/38) |
| CDLF | 0.921  (0.8658-0.9752) | 0.906  (106/117) | 0.800  (24/30) | 0.884  (130/147) | 0.946  (106/112) | 0.686  (24/35) |
| **CenterD** | CM | 0.788  (0.6477-0.9276) | 0.645  (20/31) | 0.833  (10/12) | 0.698  (30/43) | 0.909  (20/22) | 0.476  (10/21) |
| Fedavg | 0.774  (0.6187-0.9297) | 0.645  (20/31) | 0.833  (10/12) | 0.698  (30/43) | 0.909  (20/22) | 0.476  (10/21) |
| Fedprox | 0.769  (0.6123-0.9227) | 0.742  (23/31) | 0.833  (10/12) | 0.767  (33/43) | 0.920  (23/25) | 0.556  (10/18) |
| Moon | 0.788  (0.6287-0.9465) | 0.903  (28/31) | 0.583  (7/12) | 0.814  (35/43) | 0.848  (28/33) | 0.700  (7/10) |
| HarmoFL | 0.772  (0.5953-0.9478) | 0.806  (25/31) | 0.750  (9/12) | 0.791  (34/43) | 0.893  (25/28) | 0.600  (9/15) |
| PFLS | 0.882  (0.7515-1.0000) | 0.871  (27/31) | 0.833  (10/12) | 0.860  (37/43) | 0.931  (27/29) | 0.714  (10/14) |
| CDLF | 0.890  (0.7849-0.9947) | 0.871  (27/31) | 0.833  (10/12) | 0.860  (37/43) | 0.931  (27/29) | 0.714  (10/14) |
| **CenterE** | CM | 0.805  (0.6611-0.9479) | 0.857  (18/21) | 0.737  (14/19) | 0.800  (32/40) | 0.783  (18/23) | 0.824  (14/17) |
| Fedavg | 0.792  (0.6544-0.9296) | 0.810  (17/21) | 0.632  (12/19) | 0.725  (29/40) | 0.708  (17/24) | 0.750  (12/16) |
| Fedprox | 0.792  (0.6414-0.9425) | 0.667  (14/21) | 0.947  (18/19) | 0.800  (32/40) | 0.933  (14/15) | 0.720  (18/25) |
| Moon | 0.820  (0.6820-0.9571) | 0.810  (17/21) | 0.789  (15/19) | 0.800  (32/40) | 0.810  (17/21) | 0.789  (15/19) |
| HarmoFL | 0.777  (0.6184-0.9330) | 0.714  (15/21) | 0.842  (16/19) | 0.775  (31/40) | 0.833  (15/18) | 0.727  (16/22) |
| PFLS | 0.895  (0.7964-0.9931) | 0.810  (17/21) | 0.895  (17/19) | 0.850  (34/40) | 0.895  (17/19) | 0.810  (17/21) |
| CDLF | 0.935  (0.8604-1.0000) | 0.857  (18/21) | 0.947  (18/19) | 0.900  (36/40) | 0.947  (18/19) | 0.857  (18/21) |

Notes: Numbers in parentheses were used to calculate percentages. CI, confidence interval; PPV, positive predictive values; NPV, negative predictive values; CM, clinical model; Fedavg, federated averaging; Fedprox, federated proximal; Moon, model-contrastive federated learning; HarmoFL, harmonized federated learning; PFLS, personalized federated learning signatures; CDLF, clinical-deep learning fusion.

**Table S3.** Model evaluation improvement sheet

|  | IDI | | NRI | |
| --- | --- | --- | --- | --- |
| Center | Model1  Model2 | Fedavg | Model1  Model2 | Fedavg |
| CenterA | CDLF | 0.2560(P=0.00000) | CDLF | 0.8648(P=0.00000) |
| CenterB | CDLF | 0.3148(P=0.00005) | CDLF | 1.4333(P=0.00000) |
| CenterC | CDLF | 0.2379(P=0.00010) | CDLF | 0.9162(P=0.00002) |
| CenterD | CDLF | 0.3403(P=0.00785) | CDLF | 0.9545(P=0.00806) |
| CenterE | CDLF | 0.3894(P=0.00093) | CDLF | 1.1714(P=0.00010) |
|  | Model1  Model2 | Fedprox | Model1  Model2 | Fedprox |
| CenterA | CDLF | 0.2613(P=0.00000) | CDLF | 0.9853(P=0.00000) |
| CenterB | CDLF | 0.3016(P=0.00004) | CDLF | 1.2000(P=0.00001) |
| CenterC | CDLF | 0.2182(P=0.00041) | CDLF | 0.9415(P=0.00001) |
| CenterD | CDLF | 0.3490(P=0.00176) | CDLF | 0.9545(P=0.00806) |
| CenterE | CDLF | 0.4334(P=0.00120) | CDLF | 1.0286(P=0.00121) |
|  | Model1  Model2 | Moon | Model1  Model2 | Moon |
| CenterA | CDLF | 0.2803(P=0.00000) | CDLF | 0.8982(P=0.00000) |
| CenterB | CDLF | 0.3208(P=0.00088) | CDLF | 1.1000(P=0.00015) |
| CenterC | CDLF | 0.2548(P=0.00003) | CDLF | 0.9922(P=0.00000) |
| CenterD | CDLF | 0.2027(P=0.16685) | CDLF | 0.5227(P=0.19025) |
| CenterE | CDLF | 0.3172(P=0.02632) | CDLF | 1.0381(P=0.00104) |
|  | Model1  Model2 | HarmoFL | Model1  Model2 | HarmoFL |
| CenterA | CDLF | 0.2042(P=0.00002) | CDLF | 0.6267(P=0.00001) |
| CenterB | CDLF | 0.2921(P=0.00260) | CDLF | 1.1000(P=0.00015) |
| CenterC | CDLF | 0.2742(P=0.00006) | CDLF | 0.8716(P=0.00008) |
| CenterD | CDLF | 0.3870(P=0.00024) | CDLF | 1.3864(P=0.00000) |
| CenterE | CDLF | 0.4522(P=0.00015) | CDLF | 1.1714(P=0.00010) |
|  | Model1  Model2 | PFLS | Model1  Model2 | PFLS |
| CenterA | CDLF | 0.1570(P=0.00000) | CDLF | 0.7135(P=0.00000) |
| CenterB | CDLF | 0.1041(P=0.30846) | CDLF | 0.4333(P=0.19534) |
| CenterC | CDLF | 0.0981(P=0.00188) | CDLF | 0.9729(P=0.00001) |
| CenterD | CDLF | 0.1554(P=0.09998) | CDLF | 0.4091(P=0.27223) |
| CenterE | CDLF | 0.0660(P=0.50446) | CDLF | 0.3333(P=0.35650) |

Notes: IDI, integrated discrimination improvement; NRI, net reclassification improvement; CDLF, clinical–deep learning fusion; Fedavg, federated averaging; Fedprox, federated proximal; Moon, model-contrastive federated learning; HarmoFL, harmonized federated learning; PFLS, personalized federated learning signatures.
